# Supplementary material for: Hepatitis E Virus and Chronic Hepatitis in Organ-Transplant Recipients
Source: Atypon-hosted journal article supplement (doi:10.1056/nejmoa0706992), 2008-02-20
Supplement: nejm_kamar_811sa1.pdf [file nejm_kamar_811sa1.pdf]

## Supplementary Appendix

This appendix has been provided by the authors to give readers additional information about their work.

Supplement to: Kamar N, Selves J, Mansuy J-M, et al. Hepatitis E virus and chronic hepatitis in organ-transplant recipients. *N Engl J Med* 2008;358:811-7.
